# Supplementary material
Source: PubMed Central journal article supplement (PMC6180272)

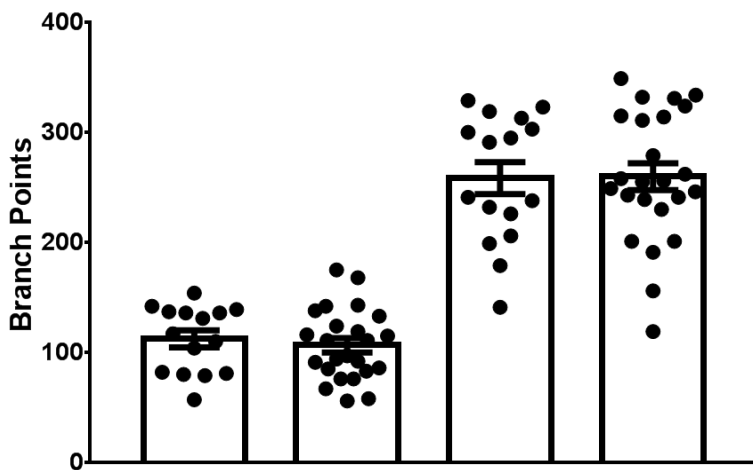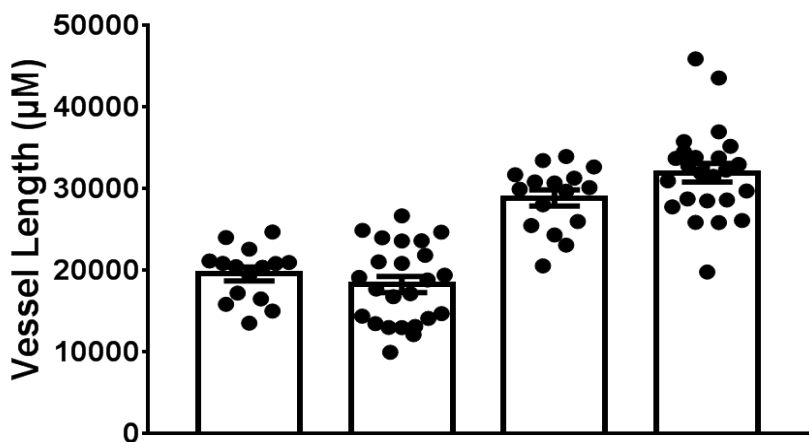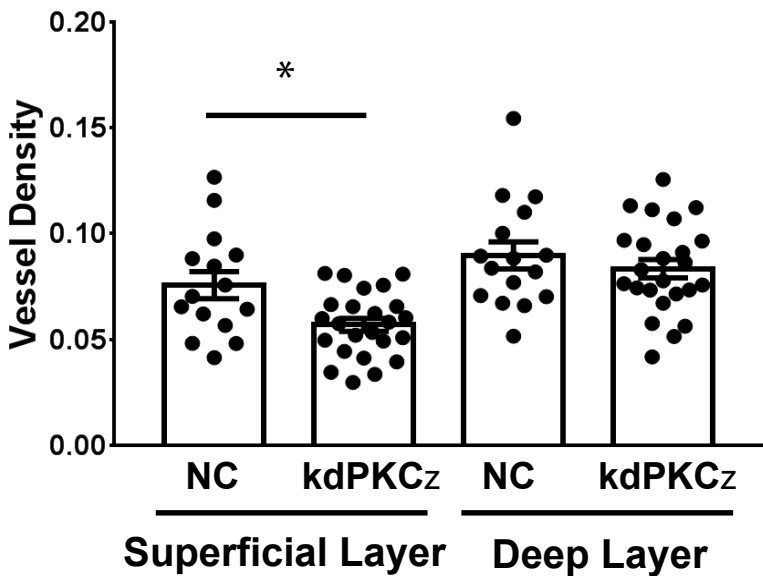

Supplement: mmc2.pdf [file mmc2.pdf]
